# Supplementary material
Source: PubMed Central journal article supplement (PMC6203772)
Supplement: 41423_2018_93_MOESM1_ESM.pdf [file 41423_2018_93_MOESM1_ESM.pdf]

**a**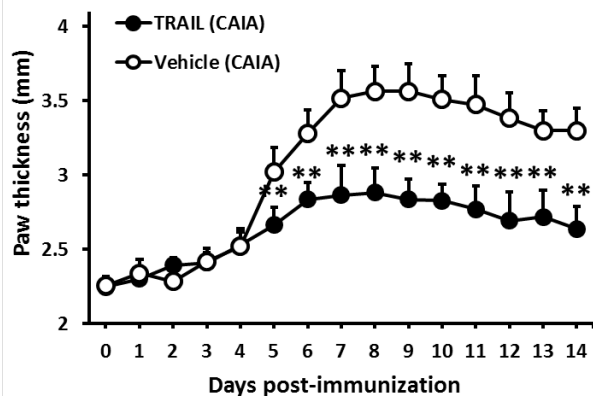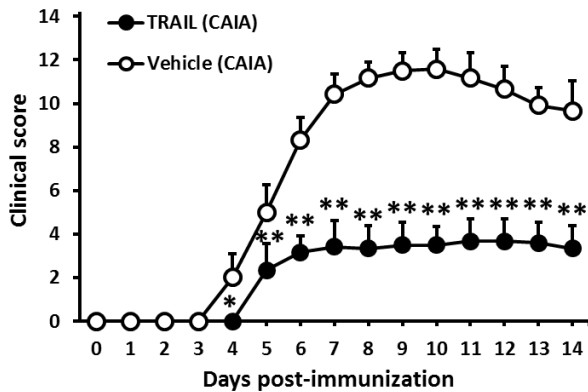**b**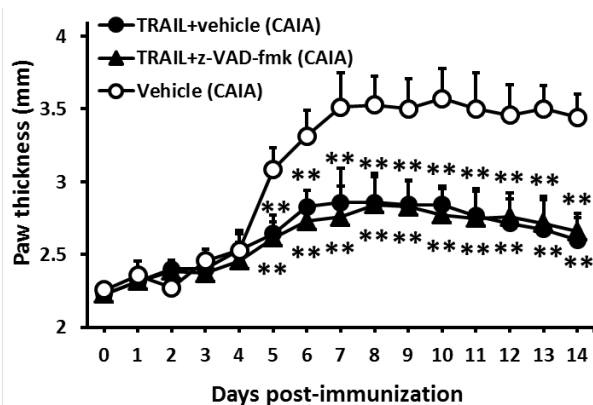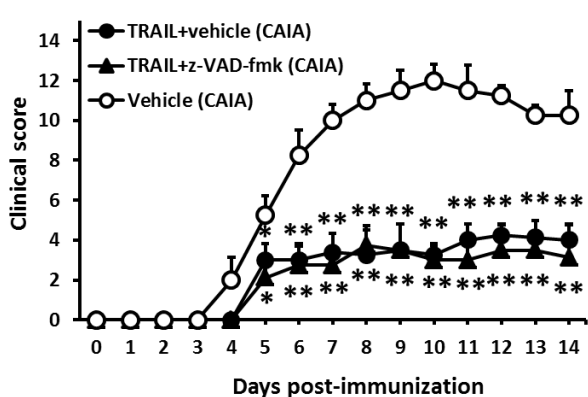

### Figure S1. Pan-caspase inhibitor failed to reverse TRAIL-mediated inhibition of joint inflammation.

a. C57BL/6 mice were immunized with a cocktail of 5 monoclonal antibodies to type II collagen (3 mg/mouse, IV) on day 0 followed by an LPS on day 3 (50 mg/mouse, IP). From day 3 post-immunization, mice were treated with vehicle or TRAIL (50 mg/mouse, IP) daily. The hind paw thickness (left panel) and clinical score (right panel) among groups were measured at the indicated time points (n= 10 in each group). \*  $p < 0.05$ , \*\*  $p < 0.01$ , by Student's *t*-test. b. C57BL/6 mice were immunized with a cocktail of 5 monoclonal antibodies to type II collagen (3 mg/mouse, IV) on day 0 followed by an LPS on day 3 (50 mg/mouse, IP). From day 3 post-immunization, mice were treated with vehicle, TRAIL (50 mg/mouse, IP) plus vehicle, or TRAIL plus z-VAD-fmk (20  $\mu$ g/mouse, IP) daily. The hind paw thickness (left panel) and clinical score (right panel) among groups were measured at the indicated time points (n= 10 in each group). \*  $p < 0.05$ , \*\*  $p < 0.01$ , by Student's *t*-test.
