# Supplementary material
Source: PubMed Central journal article supplement (PMC6203772)
Supplement: 41423_2018_93_MOESM2_ESM.pdf [file 41423_2018_93_MOESM2_ESM.pdf]

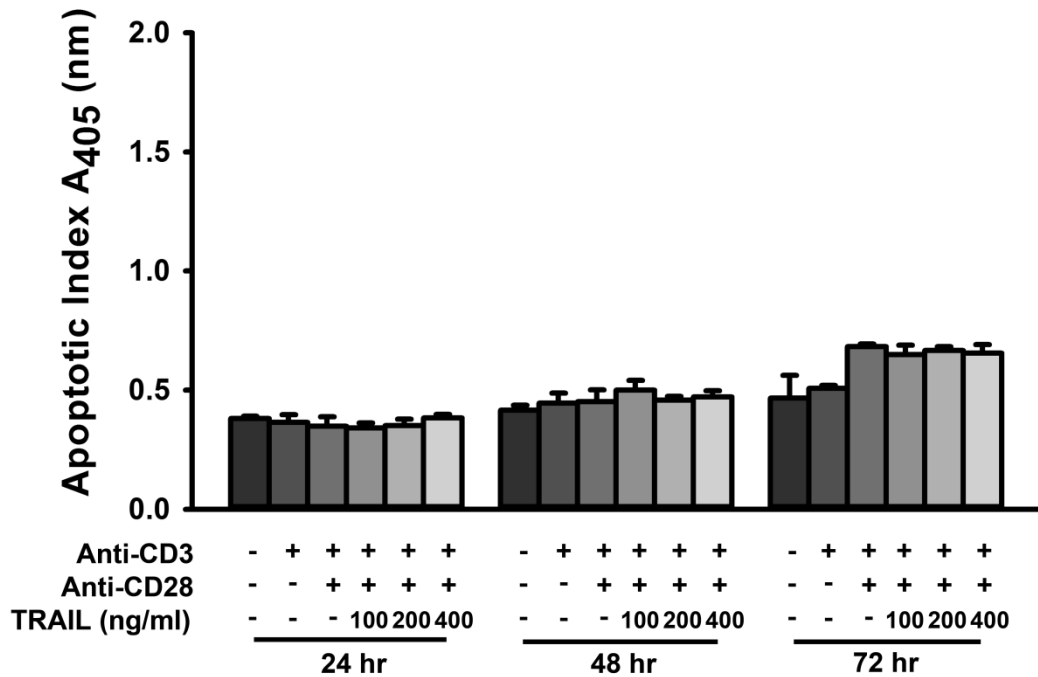

**Figure S2. TRAIL did not promote cell apoptosis in activated primary CD3<sup>+</sup> T cells.**

Isolated CD3<sup>+</sup> T cells from C57BL/6 mice were activated with anti-CD3/CD28 and treated with different dosages of TRAIL daily for 24, 48, or 72 h. The culture supernatants were collected and quantified by apoptotic assays. Data are representative of at least three independent experiments in each group
