# Supplementary material
Source: PubMed Central journal article supplement (PMC6203772)
Supplement: 41423_2018_93_MOESM3_ESM.pdf [file 41423_2018_93_MOESM3_ESM.pdf]

**a**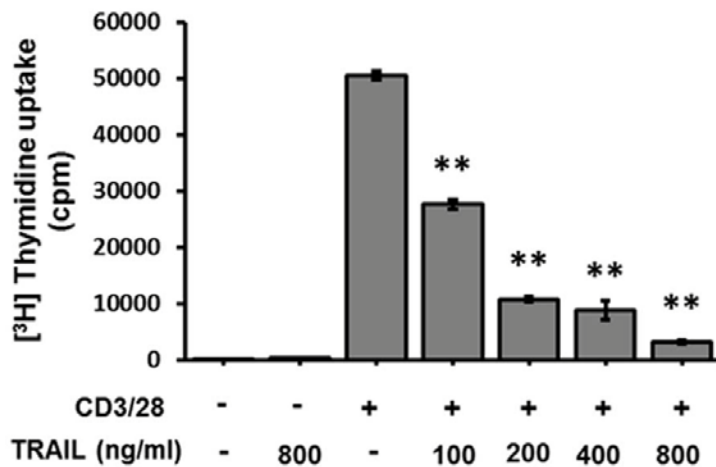**b**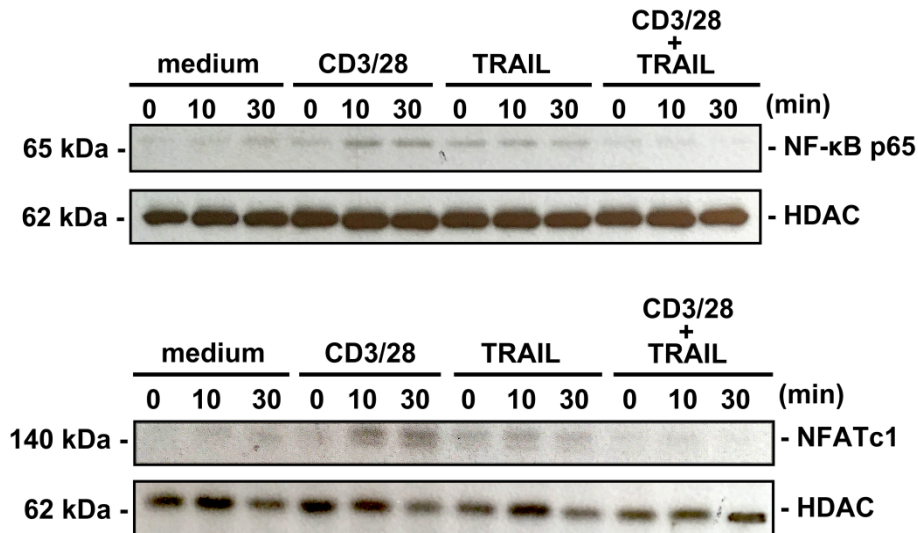

**Figure S3. TRAIL inhibited T cell proliferation via suppressing T cell receptor signaling.**

(a)  $1 \times 10^5$  primary CD4<sup>+</sup> T cells from C57BL/6 mouse were cultured for 72 hours in 96-well plate-bottom plates precoated with medium, anti-CD3 mAb and anti-CD28, TRAIL or combination of anti-CD3/anti-CD28 and TRAIL at the indicated concentration and measured by [<sup>3</sup>H] thymidine incorporation. \*\*,  $p < 0.01$ , compared to cells treated only with anti-CD3/CD28. (b) Primary CD4<sup>+</sup> T cells from C57BL/6 mouse were stimulated at the indicated time point with medium, anti-CD3 mAb and anti-CD28, TRAIL or combination of anti-CD3/anti-CD28 and TRAIL. Lysates of the nuclear fraction were prepared and immunoblotted with anti-NFκB p65, anti-NFATc1 and anti-HDAC Abs. The results indicated TRAIL-induced T cell inhibitory effects were through suppressing T cell receptor (TCR) downstream NFκB and NFATc1 signaling pathway.
